# Supplementary material for: Dental Caries, Oral Health Behavior, and Living Conditions in 6–8-Year-Old Romanian School Children
Source: Children (Basel). 2022 Jun 16;9(6):903. doi: 10.3390/children9060903 (PMC9222191; doi:10.3390/children9060903)
Supplement: Supplementary file 1 [file children-09-00903-s001.zip › children-1732606-supplementary.pdf]

| <i>Fresh fruit</i>         | <i>Gender</i> | <i>Father's education</i> | <i>Mother's education</i> | <i>Residence</i> | <i>Type of city</i> |
|----------------------------|---------------|---------------------------|---------------------------|------------------|---------------------|
| <i>Pearson Correlation</i> | .068          | .064                      | .036                      | -.036            | .012                |
| <i>Sig. (2-tailed)</i>     | .058          | .074                      | .309                      | .307             | .741                |
| <i>N</i>                   | 779           | 777                       | 781                       | 786              | 786                 |

**Table S1.** *Correlation between fresh fruit consumption and children's demographics*

| <i>Biscuits, cookies, creme, sweet pies, sweet buns</i> | <i>Gender</i> | <i>Father's education</i> | <i>Mother's education</i> | <i>Residence</i> | <i>Type of city</i> |
|---------------------------------------------------------|---------------|---------------------------|---------------------------|------------------|---------------------|
| <i>Pearson Correlation</i>                              | -.029         | <b>-.179**</b>            | <b>-.191**</b>            | <b>-.096**</b>   | -.064               |
| <i>Sig. (2-tailed)</i>                                  | .415          | <b>.000</b>               | <b>.000</b>               | <b>.007</b>      | .073                |
| <i>N</i>                                                | 775           | 773                       | 777                       | 782              | 782                 |

**Table S2.** *Correlation between the consumption of biscuits, cakes, cream, sweet pies, buns and children's demographics*

| <i>Sweetened drinks</i>    | <i>Gender</i> | <i>Father's education</i> | <i>Mother's education</i> | <i>Residence</i> | <i>Type of city</i> |
|----------------------------|---------------|---------------------------|---------------------------|------------------|---------------------|
| <i>Pearson Correlation</i> | -.026         | <b>-.321**</b>            | <b>-.414**</b>            | <b>-.244**</b>   | <b>-.156**</b>      |
| <i>Sig. (2-tailed)</i>     | .476          | <b>.000</b>               | <b>.000</b>               | <b>.000</b>      | <b>.000</b>         |
| <i>N</i>                   | 775           | 773                       | 777                       | 782              | 782                 |

**Table S3.** *Correlation between the consumption of sweetened soft drinks and the demographic data of children*

| <i>Chewing gum with sugar</i> | <i>Gender</i> | <i>Father's education</i> | <i>Mother's education</i> | <i>Residence</i> | <i>Type of city</i> |
|-------------------------------|---------------|---------------------------|---------------------------|------------------|---------------------|
| <i>Pearson Correlation</i>    | -.030         | -.312**                   | -.402**                   | -.269**          | -.223**             |
| <i>Sig. (2-tailed)</i>        | .403          | .000                      | .000                      | .000             | .000                |
| <i>N</i>                      | 765           | 763                       | 767                       | 772              | 772                 |

**Table S4.** *Correlation between sugar consumption of chewing gum and children's demographics*

| <i>Sweets/ candies</i>     | <i>Gender</i> | <i>Father's education</i> | <i>Mother's education</i> | <i>Residence</i> | <i>Type of city</i> |
|----------------------------|---------------|---------------------------|---------------------------|------------------|---------------------|
| <i>Pearson Correlation</i> | .019          | -.206**                   | -.223**                   | -.103**          | -.106**             |
| <i>Sig. (2-tailed)</i>     | .605          | .000                      | .000                      | .004             | .003                |
| <i>N</i>                   | 774           | 772                       | 776                       | 781              | 781                 |

**Table S5.** *Correlation between the consumption of sweets / candies and the demographic data of children*

| <i>Sweetened milk with sugar/honey</i> | <i>Gender</i> | <i>Father's education</i> | <i>Mother's education</i> | <i>Residence</i> | <i>Type of city</i> |
|----------------------------------------|---------------|---------------------------|---------------------------|------------------|---------------------|
| <i>Pearson Correlation</i>             | .039          | -.216**                   | -.240**                   | -.141**          | -.100**             |
| <i>Sig. (2-tailed)</i>                 | .280          | .000                      | .000                      | .000             | .005                |
| <i>N</i>                               | 768           | 767                       | 770                       | 774              | 774                 |

**Table S6.** *Correlation between milk / sugar / honey consumption and child demographics*
